# Supplementary material for: Predicting thunderstorm risk probability at very short time range using deep learning
Source: Copernicus journal article supplement (doi:10.5194/egusphere-2025-2893), 2025-07-23
Supplement: Supplementary file [file egusphere-2025-2893-AC2-supplement.pdf]

---

## Answer to the second review:

---

### Acknowledgements:

We sincerely thank the reviewer for the time and care dedicated to evaluating our work. We thoroughly considered all the comments provided in this second review and revised the manuscript to address each point as clearly and comprehensively as possible.

### Concerns:

#### First one:

1) Since the models were trained separately for each forecast horizon, there can be concerns of incoherent forecasts between different forecast horizons. The authors should provide some discussion or visualizations on how the forecasts look between different timestamps.

#### Answer:

Thank you for this comment. Indeed, ensuring coherence across predictions from models trained for different forecast horizons is not straightforward. Since each model is trained independently and therefore learns different weights, using one model for a 10-minute forecast, another for 15 minutes, and so on, could naturally lead to inconsistencies when chaining predictions for the same application.

However, only one model corresponding to a specific forecast horizon could be employed operationally. For instance, in an aviation context, air-traffic controllers or pilots may decide to rely solely on 30-minute forecasts to anticipate regions with high lightning risk. From the user's perspective, predictions remain fully consistent because they are produced by a single model dedicated to the selected horizon. Here, predictions are made using the same model but for several instants each separated by 5 minutes: 01:01 UTC, 01:06 UTC, 01:11 UTC and 01:16 UTC. An example of predicted risk maps given by the same 30-min prediction model can be seen here:

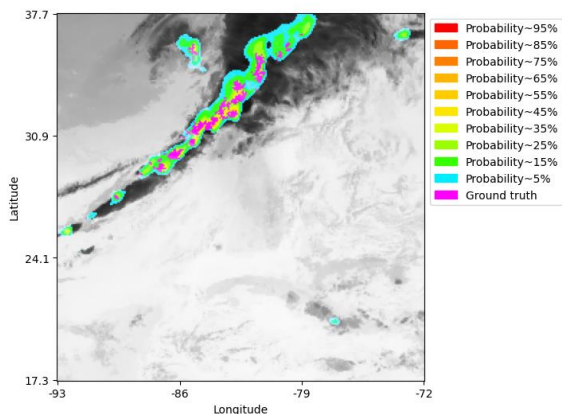

Figure 1 - 30-min predictions for 01:01 UTC

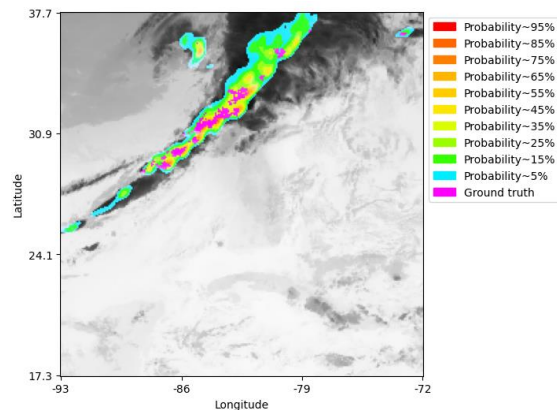

Figure 2 - 30-min predictions for 01:06 UTC

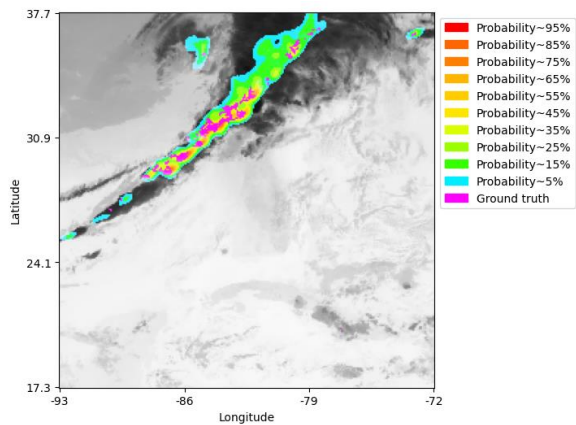

Figure 3 - 30-min predictions for 01:11 UTC

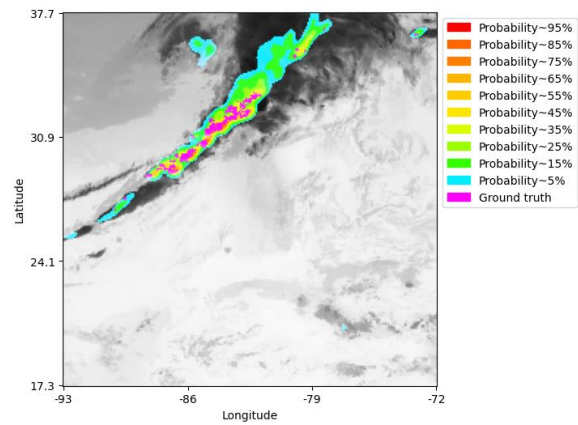

Figure 4 - 30-min predictions for 01:16 UTC

In addition, we are currently working on an autoregressive version of the model, which will use its own predictions to generate the next ones, as part of future work.

#### What we change on the paper:

On line 346, we added the following sentence: “[...] each lead time. For this reason, in operational settings, a single model making predictions at one forecast horizon could be used. With this model, predictions are generated every 5 minutes to ensure consistency across forecasts. All metrics were [...]”.

#### Second one:

2) Was the evaluation dataset fixed for the different models per forecast horizon or was the 30% chosen separately for each horizon?

#### Answer:

Thank you for your question. Maybe this point was not well explained in the manuscript. The training and evaluation datasets are kept fixed for all training runs and for every forecast horizon to ensure consistency and to clearly assess the impact of predicting at longer lead times.

#### What we change on the paper:

On line 165, the last sentence was replaced by: “The database was randomly split by day into 70% for training and 30% for testing, and this split was kept unchanged for all models, regardless of the forecast horizon.”.

#### Third one:

3) The training / evaluation dataset seems quite small, this also shows in the results as the results are quite jumpy from one forecast horizon to another. I wonder if there was any overfitting also due to this.

#### Answer:

Thank you for this pertinent comment. As you pointed out, the results can appear somewhat jumpy, and we believe this is mainly due to the limited number of trained networks per forecast horizon (whose results are then averaged) rather than to the size of the dataset. Indeed, the variance remains relatively high because we could not train a large number of models for each horizon, as the

computational cost would have been prohibitive. In this study, we trained five different models and averaged their results to compute the metrics.

Moreover, while a larger dataset would certainly help improve overall performance, our experiments show that the model performs well over the studied area and generalizes effectively to other regions and seasons. This suggests that overfitting is not a major concern in our case.

#### Fourth one:

4) To overcome the concerns around a small training / validation dataset, it might be interesting to see if the results generalize to a different part of CONUS - likely keeping the latitude boundaries the same but shifting the longitude bounding box more to the west. If the model yields good evaluation results trained over the Gulf of Mexico but evaluated over a different region the results might be more robust.

#### Answer:

Thank you for your comment. The first reviewer also raised this point, and your observation further confirms that strengthening the robustness assessment by applying the model to another area will improve the quality of the paper. To address this concern, we conducted additional experiments to show that the method also performs well across different regions, seasons, and times of day. Specifically, we used data from another region centered over Panama, between latitudes  $[0^\circ, 15^\circ\text{N}]$  and longitudes  $[100^\circ\text{W}, 70^\circ\text{W}]$ , rather than from another part of CONUS, in order to increase the level of generalization required.

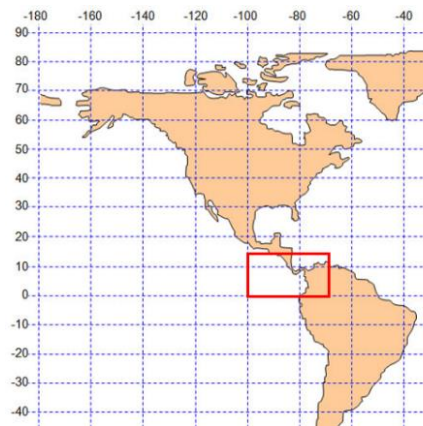

Figure 5 - New inference selected area centered over the Panama

This region does not overlap with the training and testing area, which was located between latitudes  $[15^\circ\text{N}, 40^\circ\text{N}]$  and longitudes  $[100^\circ\text{W}, 65^\circ\text{W}]$ .

Four days in August 2024 were selected during which thunderstorms occurred in this region. The data were collected and processed for the period between 12:00 UTC and 15:00 UTC. With this selection, we were able to test the robustness of the method on summer afternoons over a different region, as suggested in your comment. We used GOES-R ABI Brightness Temperature (BT), GLM groups data, and GFS best lifted index (bestLI) and maximum relative humidity (maxRH) as a spatio-temporal sequence to infer on this new test case using our pre-trained model. Here are the obtained mean results in terms of metrics over the 4 selected dates:

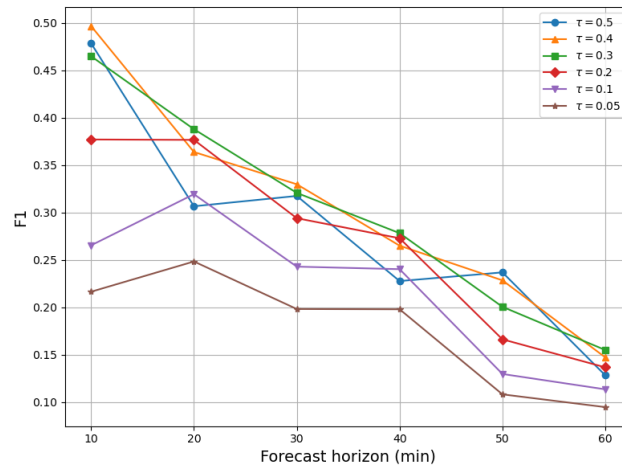

Figure 6 - F1-Score plotted for forecast horizons every 10 minutes up to 1 hour using several thresholds from 0.5 to 0.05.

Visually, we also plotted a map showing the results for one of these dates (on 11 August 2025) and for a 10-mn forecast horizon.

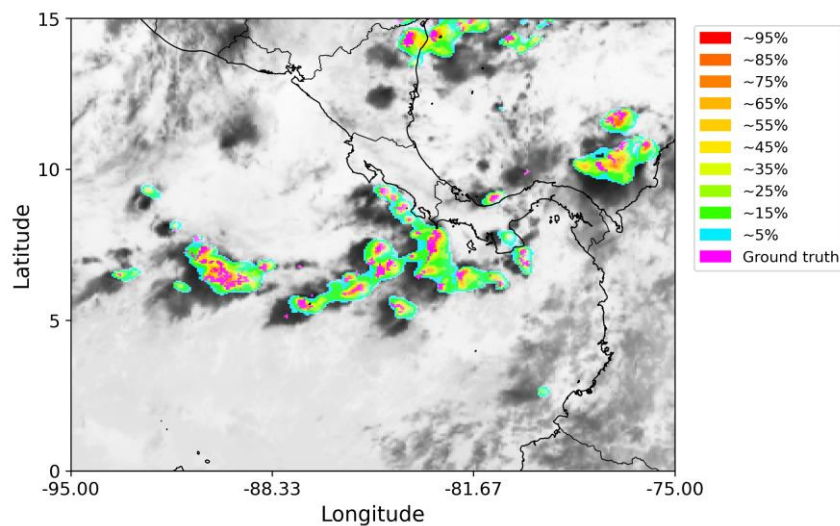

Figure 7 - 10-mn predictions on 11 August 2025.

The network seems to successfully predict lightning activity probability across another season, time of day, and region, achieving results comparable to those obtained over the Gulf of Mexico. In future work, additional experiments will be conducted on a larger dataset, and fine-tuning will be explored for different regions.

#### What we change on the paper:

We added a new subsection in the discussion section: 5.3 – “Assessment of the robustness of the method” after line 378 which contains the following text: “To ensure that the method can capture the seasonal, diurnal, and regional differences in thunderstorm dynamics, the model’s performance has been evaluated over a new region centered on Panama. This area extended over latitudes  $[0^\circ, 15^\circ\text{N}]$  and longitudes  $[100^\circ\text{W}, 70^\circ\text{W}]$  and does not overlap with the training domain. Several days in August 2024 were selected when thunderstorms occurred, focusing on the period between 12:00 and 15:00 UTC to assess the model’s performance during summer afternoons. Input images were generated using

*the same GOES-R satellite sensors (ABI and GLM) and outputs from the GFS model. In this region, only Full Disk data from GOES-R's sensors are available, resulting in a temporal resolution of 10 minutes. Robustness tests were conducted, and the corresponding performance metrics are presented in Figure 14a. Despite the current limited size of the Panama dataset, the method generalizes well to these new conditions, achieving F1-Scores close to those obtained over the Gulf of Mexico. Moreover, it still produces well-calibrated probabilistic maps representing the risk of electrical activity as shown in Figure 14b."*

Fifth one:

5) It would be good to discuss the results separated by diurnal cycles and any peaks through the day / hours of the day.

Answer:

We fully agree with your comment. However, at this stage, we are not able to perform this analysis because the entire dataset was selected between 00:00 UTC and 05:00 UTC, which prevents us from comparing the model's inference performance across different hours of the day. This is something we plan to address in future work. For now, we have only conducted additional tests on a few afternoon cases over Panama, which does not allow us to complete the full analysis you suggested.

What we change on the paper:

We have added this idea into the perspectives section on line 396: *"[...] autoregressive model. In addition, we plan to analyze the method's performance across different hours of the day, seasons, and regions using statistical evaluations. Finally, [...]"*.

Sixth one:

6) The authors state they selected the 13th band of the ABI sensor (infrared at 10.3 $\mu$ m) because it is "more sensitive to cloud classification". While this band's Brightness Temperature (BT) is correlated with high cloud tops (cumulonimbus), the argument for selecting only this single band out of 16 is not fully explored. The addition of other relevant channels (e.g., water vapor channels) could provide complementary information about the atmospheric column. The authors could at least outline any restrictions they faced in incorporating other bands.

Answer:

We agree with your pertinent remark. As you noted, the 13<sup>th</sup> band is indeed well suited for this task because it is strongly correlated with cloud-top properties, but additional bands such as bands 8, 9, and 10 related to water vapor could also have been included. For now, we chose not to add more bands in order to focus on the most informative inputs and to limit computational cost and preprocessing requirements. Moreover, water-vapor information is partly accounted for through the use of maximum relative humidity, which integrates relative humidity across all atmospheric levels. Nevertheless, we plan to investigate the impact of adding other ABI bands as well as additional data sources, such as radar observations, in future work.

What we change on the paper:

In the perspectives section, we revised line 394 as follows: *"First, we plan to incorporate radar data into the input, as it has been shown to improve prediction performance (Leinonen et al., 2022), and to explore the integration of additional ABI spectral bands."*

## Seventh one:

7) The authors use of NWP data is not entirely clear with regards to which initialization / forecast time is fed as input into the model. The authors state: "Specifically, the following configuration was adopted: 00:00 UTC forecasts were applied from 00:00 UTC to 01:30 UTC, 03:00 UTC forecasts from 01:30 UTC to 04:30 UTC, and 06:00 UTC forecasts from 04:30 UTC to 05:00 UTC".

My questions are - (a) how will this work in realtime because it seems the forecasts initialized at 6:00 UTC are being applied to init times in the past? (b) How will the operational latencies of GFS impact performance?

## Answer:

Thank you for this comment. The explanation of how the NWP data are used may indeed not have been sufficiently clear in the manuscript. In practice, NWP operational run provide forecast products every 3 or 6 hours, with lead times ranging from 0 to 96 hours. Because our network was trained on archived data, these forecasts are only available every 3 hours. For example, in our work, we used the 00:00 UTC production time with its associated forecast products at 00:00 UTC, 03:00 UTC and 06:00 UTC.

- (a) For real-time operations, the use of NWP's outputs will not introduce any difficulty. Since forecasts are delivered regularly, the method will use the most recent available production time forecast products relative to the prediction interval, ensuring optimal performance.
- (b) Therefore, as long as the GFS forecasts are produced normally, no latency will be introduced and the model's performance will be preserved. In the unlikely event that a forecast cycle fails (for example, the 06:00 UTC run), the model can still rely on the 00:00 UTC forecasts to provide the predictions at 09:00 UTC for example. This fallback solution remains operational but, as NWP skill naturally decreases with lead time, a slight degradation in performance would be expected.

## What we change on the paper:

We modify the paragraph on line 150 and replace it with the following one: "[...] redundancy. Specifically, we only used the 00:00 UTC production time. The 00:00 UTC forecast product was applied to data between 00:00 and 01:30 UTC, the 03:00 UTC one to data between 01:30 and 04:30 UTC, and the 06:00 UTC one to data between 04:30 and 05:00 UTC."

## Eighth one:

8) In Figure 11, it would be more useful to have a PR curve for a few forecast horizons instead of two different figures for Precision and Recall and on the curve the impact of choosing different thresholds can be plotted. That would make it much more easier to understand the tradeoff.

## Answer:

We understand your concern so we have plotted the PR curves for different forecast horizons using ED-DRAP.

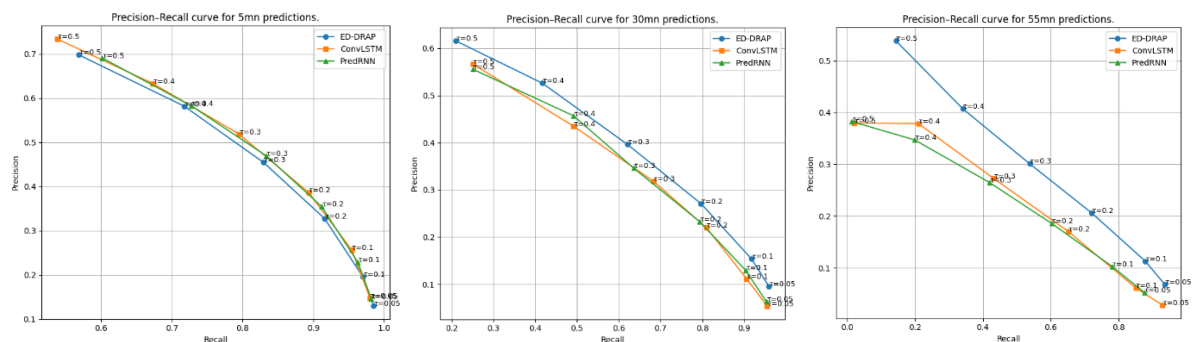

Figure 8 - PR curves for 5, 30 and 55-min predictions



As a matter of fact, this helps better understand the tradeoff between precision and recall and how to choose the appropriate threshold for each application. These new plots show that ED-DRAP gives results very close to those of convLSTM and predRNN for short forecast horizons, but clearly performs better for longer ones.

#### What we change on the paper:

As you suggested, we replaced the precision and recall curves for each forecast horizon and each tested model in Figure 11 with the corresponding PR curves for the 30-min and 55-min lead times. We also updated the legend, which now reads: *“Precision–Recall curves for 30-min lead time (a) and 55-min lead time (b) for the different tested models and several thresholds. Panel (c) shows the evolution of the F1 score, with standard deviation represented as shaded areas, across all lead times and all tested models.”*

A sentence was added on line 326: *“[...] of around 35%. The balance between recall and precision is evaluated in Figures 11a and 11b for 30 and 55-min predictions. Given that [...]”* This addition guides the reader toward the new figures and helps clarify how the choice of threshold influences the trade-off between precision and recall.

In addition, we modified the sentence on lines 351–355 by the following one: *“Then, in Figures 11a and 11b, both PredRNN and ConvLSTM fail to outperform ED-DRAP, which achieves a higher overall precision–recall balance across all thresholds. Moreover, this advantage of ED-DRAP increases with the forecast horizon. This improvement may be due to the fact that PredRNN and ConvLSTM have limited capacity to capture the complex spatio-temporal correlations necessary for accurately predicting electrical activity, particularly for rare and highly localized events.”*

Finally, we chose to keep the F1 score curve, as it provides essential insight into how performance evolves across the full range of lead times.

#### Ninth one:

9) Authors state that they use 0.05 threshold to plot the risk probability map since they want high recall but that can lead to a very low precision. I think a more robust explanation of chosen thresholds and their impact on metrics should be discussed.

#### Answer:

Thank you for your comment. Indeed, since the network outputs are calibrated, the plotted maps are directly interpretable. In particular, the chosen threshold corresponds to the expected percentage of missed lightning: for instance, a threshold of 0.3 would miss 30% of lightning events but provide higher precision than a threshold of 0.05.

#### What we change on the paper:

As suggested, we modified the sentence on lines 315–316 to better explain the impact of the threshold choice on the metrics: *“For instance, a high threshold results in more missed lightning but higher precision, whereas a low threshold allows detecting more lightning with lower precision. On the maps, since the network gives well calibrated outputs, the threshold directly corresponds to the expected percentage of missed lightning.”*

In addition, on lines 323–324, we revised the sentence as follows: *“Therefore, we selected a threshold of 0.05 to plot the blue areas on the risk probability map, where only 5% of lightning is missed, to illustrate the network’s ability to detect a high number of lightning events.”*

## Tenth one:

10) In Figure 11(a) and (b) the result for precision and recall jumps quite a bit across different horizons and sometimes lower, sometimes higher than other models. It's actually unclear if the model truly performs better than others. In 11(c) the ED-DRAP model actually performs worse than others for first 30 mins and then better. I think it would help to report more metrics here and better understand the performance at earlier horizons across the different baselines. Maybe visualize the probability maps for the different models.

## Answer:

Thank you for your insightful comment. As you noted, the ED-DRAP network can sometimes yield lower metric scores compared to other state-of-the-art networks. However, the key advantage of ED-DRAP is its ability to provide calibrated outputs while remaining competitive, and even superior, for longer forecast horizons, as illustrated in Figure 12. Moreover, thanks to its attention mechanisms, the network is better able to predict over extended horizons than the other models. As suggested, we have added new metrics including F0.5 and F2 scores and missed lightning rate for the four models across all forecast horizons to enable a more comprehensive comparison.

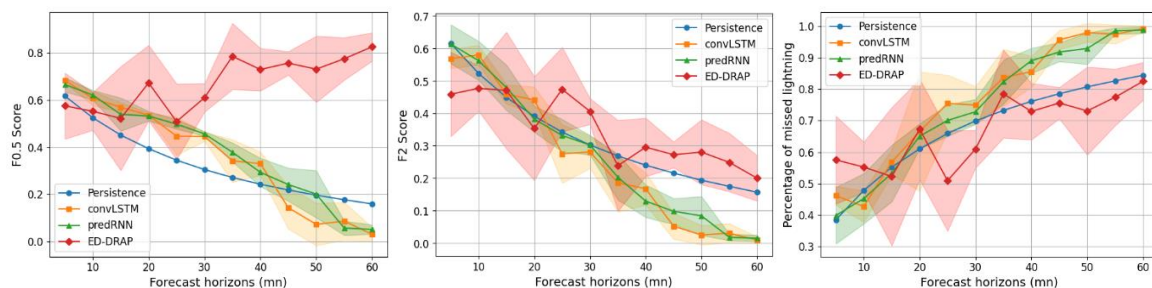

Figure 9 - F0.5 Score, F2 Score and missed lightnings using the different models for each forecast horizon

The F0.5 score corresponds to a F-score where the precision gets the priority, and we see that ED-DRAP give far better results than the other models. In addition, the F2 Score that gives priority to the recall shows similar curves than for the F1 Score and on average, ED-DRAP is better than the other models, especially after 20-minute lead time. Lastly, the missed plot also shows that on average, ED-DRAP misses less lightnings than the other networks especially after 20 minutes lead time.

We also included probability maps from each model for 30-minute predictions to help visualization.

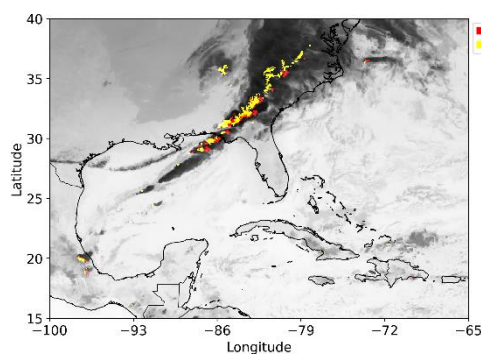

Figure 10 - 30-mn predictions using persistence for 00:31 UTC.

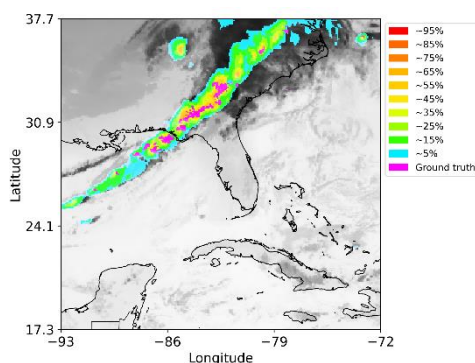

Figure 11 - 30-mn predictions using convLSTM for 00:31 UTC.



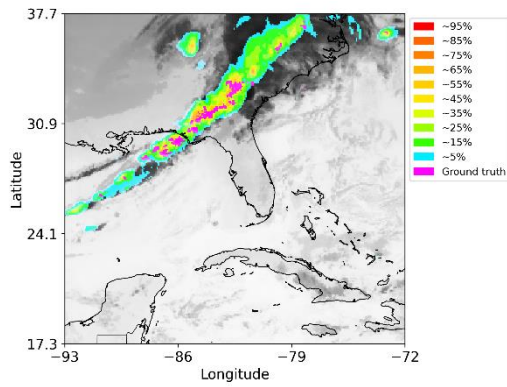

Figure 12 - 30-mn predictions using *predRNN* for 00:31 UTC.

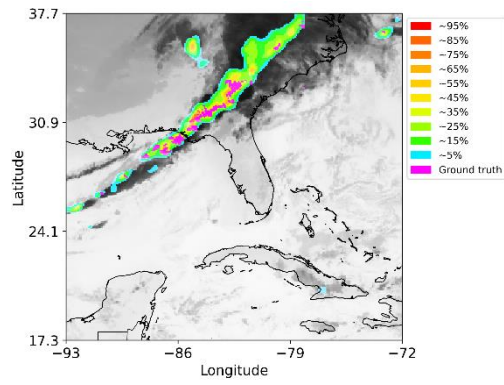

Figure 13 - 30-mn predictions using *ED-DRAP* for 00:31 UTC.

As the convLSTM, persistence and predNN outputs are not calibrated, the maps cannot be interpreted as probabilities of having electrical activity directly. The only one that correspond to real probabilities is the one using ED-DRAP which also shows better results visually (less false alarms and high recall).
